# Supplementary material for: Protein Complexes in Bacteria
Source: PubMed Central journal article supplement (PMC4344305; doi:10.1371/journal.pcbi.1004107), 2015-02-27
Supplement: pcbi.1004107.s002.pdf [file pcbi.1004107.s002.pdf]

# Figure S2

- Cell Division
- Cell Structure
- Chaperone, Protein Assembly, or Modification
- Defense/Survival/Stress Response
- DNA Replication, Repair, or Modification
- Metabolism
- Motility/Chemotaxis
- RNA Modification
- Transcription or Transcriptional Regulation
- Translation or Translational Regulation
- Transport

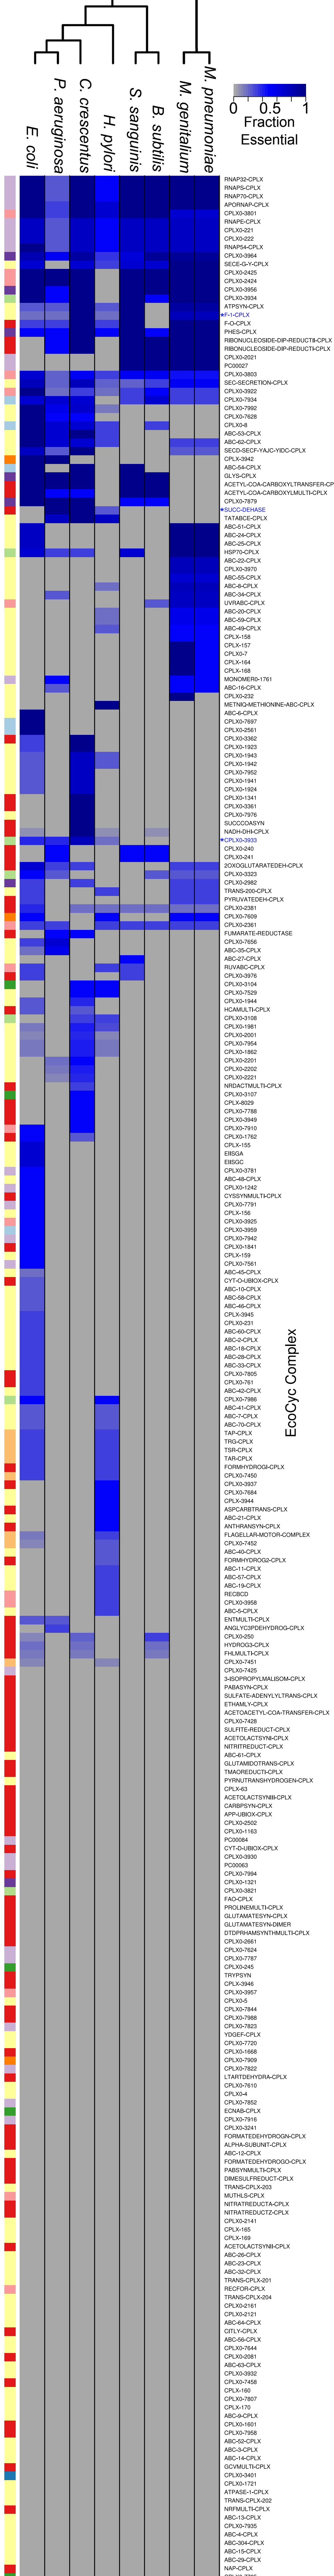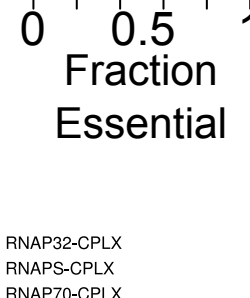

EcoCyc Complex
