# Supplementary material for: Protein Complexes in Bacteria
Source: PubMed Central journal article supplement (PMC4344305; doi:10.1371/journal.pcbi.1004107), 2015-02-27

Figure S3

A

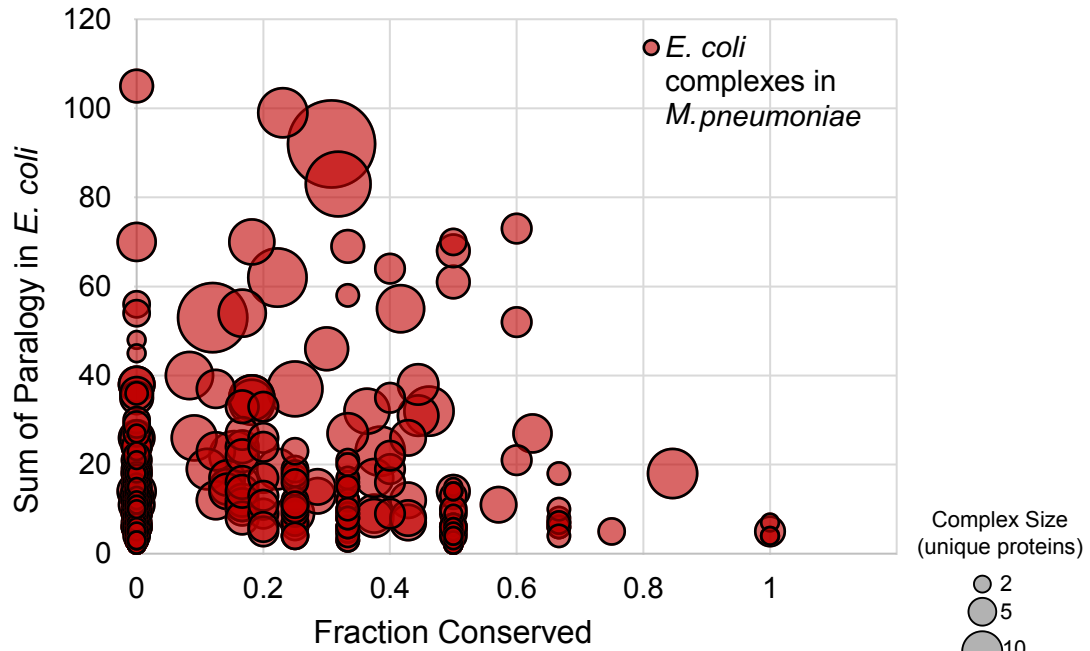

B

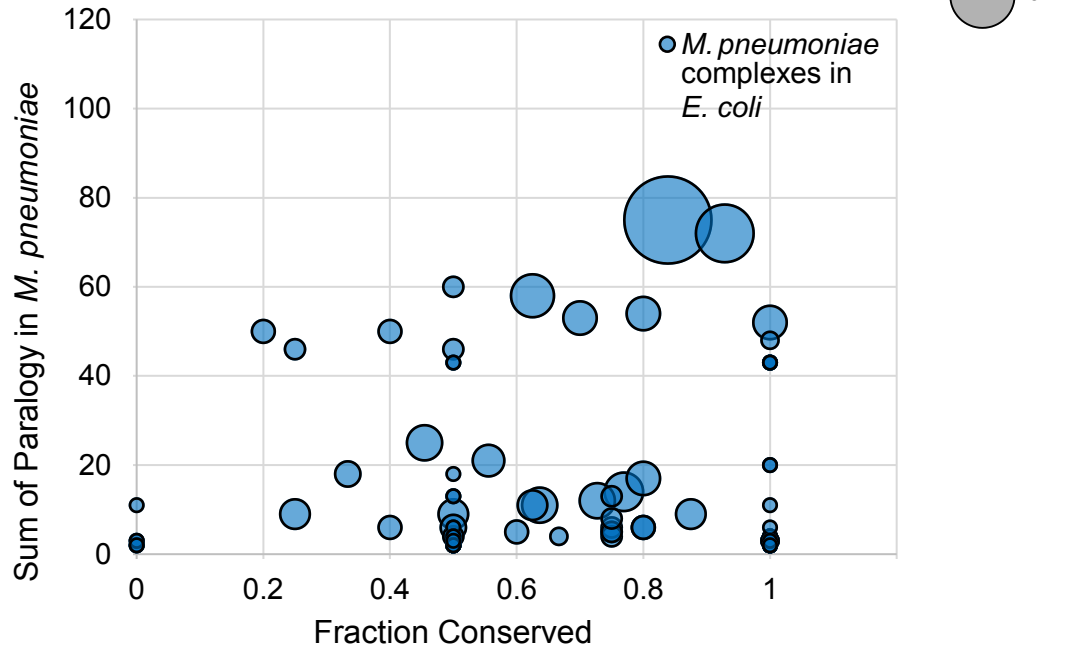

Supplement: pcbi.1004107.s003.pdf [file pcbi.1004107.s003.pdf]
