# Supplementary material for: Protein Complexes in Bacteria
Source: PubMed Central journal article supplement (PMC4344305; doi:10.1371/journal.pcbi.1004107), 2015-02-27
Supplement: pcbi.1004107.s004.pdf [file pcbi.1004107.s004.pdf]

Figure S4

A

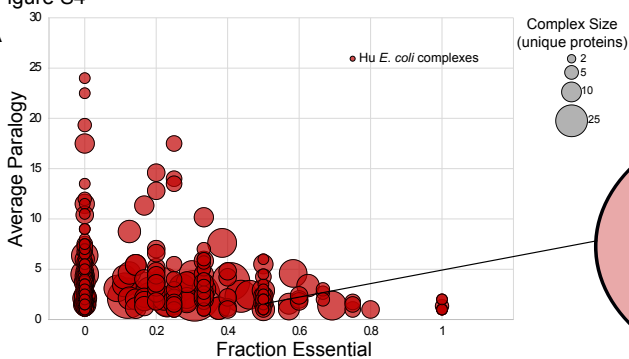

D

OGs with red borders are present in more than one of these example complexes. Hu *E. coli* complex 117

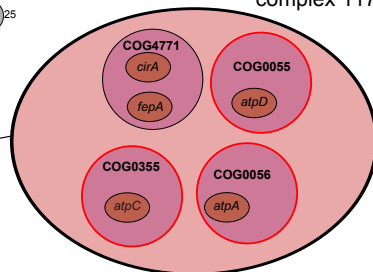

B

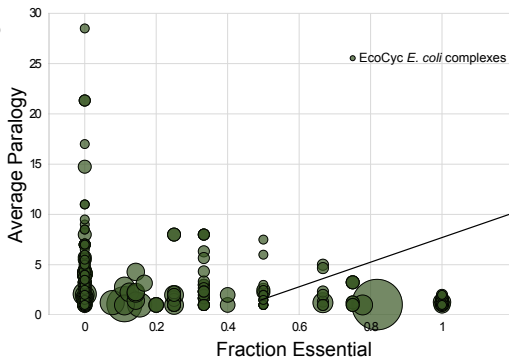

EcoCyc *E. coli* complex F-1-CPLX

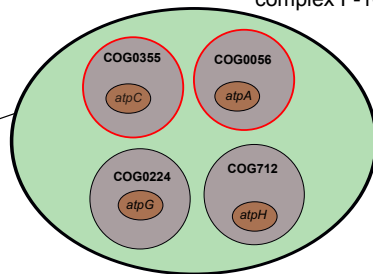

C

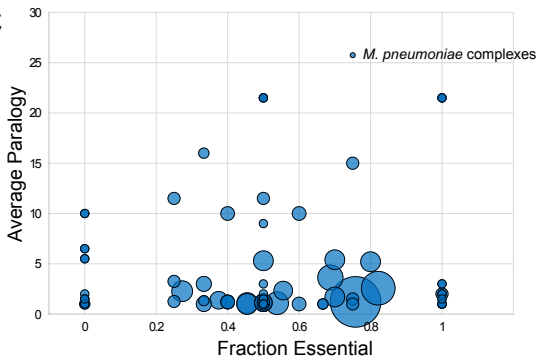

*M. pneumoniae* complex 47

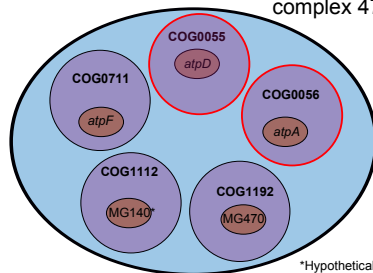

\*Hypothetical gene assigned to observed peptide.
