# Supplementary material for: Protein Complexes in Bacteria
Source: PLoS Comput Biol. 2015 Feb 27;11(2):e1004107. doi: 10.1371/journal.pcbi.1004107 (PMC4344305; doi:10.1371/journal.pcbi.1004107)
Supplement: S11 Table — (XLSX) [file pcbi.1004107.s018.xlsx]

## Sheet: S11
Table S11. Experimental protein complexes containing uncharacterized components.
Data Set	CplxID	Size	Unknown Components	Highly Conserved Components	Highly Essential Components	Notes
Hu et al. (2009)	1	39	13	26	4	degradosome
	2	25	10	15	2	resolvasome
	5	16	7	9	2
	23	9	6	5	0	HflB complex?
	3	22	4	15	6	ClpP protease complex?
	9	13	4	10	2	efflux transport system?
	15	11	4	7	1
	4	18	3	13	3	ABC transporter
	11	12	3	9	1	DosC-DosP complex?
	25	9	3	4	1	ABC transporter
	52	6	3	4	1
	59	6	3	4	1
	105	5	3	4	1
	66	6	3	3	1
	101	5	3	3	1
	26	8	3	6	0
	40	7	3	4	0
	79	5	3	3	0
	90	5	3	3	0
	109	5	3	3	0
	62	6	3	1	0
	12	12	2	7	5
	20	10	2	10	4
	36	7	2	5	4
	41	7	2	7	1
	18	11	2	5	1
	53	6	2	5	1
	91	5	2	4	1
	146	4	2	4	1
	75	5	2	3	1
	80	5	2	3	1
	88	5	2	3	1
	143	4	2	3	1
	151	4	2	3	1
	85	5	2	2	1
	14	11	2	6	0
	33	8	2	6	0
	48	7	2	6	0
	34	8	2	5	0
	100	5	2	5	0
	45	7	2	4	0
	49	7	2	4	0
	55	6	2	4	0
	68	6	2	4	0
	103	5	2	4	0
	116	4	2	3	0
	127	4	2	3	0
	145	4	2	3	0
	149	4	2	3	0
	251	3	2	3	0
	123	4	2	2	0
	245	3	2	2	0
	84	5	2	1	0
	134	4	2	1	0
	154	4	2	1	0
	6	13	1	10	5
	10	13	1	10	5
	27	8	1	8	4
	29	8	1	7	4
	28	8	1	6	3
	30	8	1	6	3
	42	7	1	3	3
	22	9	1	8	2
	21	9	1	5	2
	60	6	1	5	2
	58	6	1	4	2
	137	4	1	2	2
	8	13	1	10	1
	19	11	1	9	1
	17	11	1	8	1
	50	6	1	5	1
	95	5	1	5	1
	97	5	1	5	1
	35	8	1	4	1
	98	5	1	4	1
	107	5	1	4	1
	121	4	1	3	1
	82	5	1	2	1
	102	5	1	2	1
	112	4	1	2	1
	165	3	1	2	1
	173	3	1	2	1
	176	3	1	2	1
	192	3	1	2	1
	232	3	1	2	1
	239	3	1	2	1
	346	2	1	2	1
	204	3	1	1	1
	13	12	1	5	0
	39	7	1	5	0
	46	7	1	5	0
	108	5	1	5	0
	44	7	1	4	0
	54	6	1	4	0
	56	6	1	4	0
	61	6	1	4	0
	78	5	1	4	0
	86	5	1	4	0
	110	4	1	4	0
	120	4	1	4	0
	161	4	1	4	0
	65	6	1	3	0
	67	6	1	3	0
	69	6	1	3	0
	73	5	1	3	0
	87	5	1	3	0
	89	5	1	3	0
	92	5	1	3	0
	94	5	1	3	0
	114	4	1	3	0
	150	4	1	3	0
	198	3	1	3	0
	210	3	1	3	0
	240	3	1	3	0
	72	5	1	2	0
	93	5	1	2	0
	115	4	1	2	0
	118	4	1	2	0
	148	4	1	2	0
	156	4	1	2	0
	181	3	1	2	0
	222	3	1	2	0
	227	3	1	2	0
	237	3	1	2	0
	247	3	1	2	0
	261	3	1	2	0
	262	3	1	2	0
	264	3	1	2	0
	289	2	1	2	0
	290	2	1	2	0
	339	2	1	2	0
	354	2	1	2	0
	364	2	1	2	0
	365	2	1	2	0
	403	2	1	2	0
	43	7	1	1	0
	74	5	1	1	0
	126	4	1	1	0
	162	4	1	1	0
	203	3	1	1	0
	228	3	1	1	0
	230	3	1	1	0
	246	3	1	1	0
	248	3	1	1	0
	259	3	1	1	0
	426	2	1	1	0
	99	5	1	0	0
	178	3	1	0	0
	258	3	1	0	0
Kühner et al (2009), table S2	50	62	2	39	33	Ribosome
	10	10	2	8	6	Aminoacyl-tRNA synthetase complex
	36	10	2	8	5	Complex function unknown - contains GroL/GroS
	8	16	2	7	1	Protein chaperone complex
	19	3	2	3	1	Complex function unknown - contains thymidylate synthase
	49	28	1	19	12	RNA polymerase complex
	44	13	1	8	5	Pyruvate dehydrogenase complex
	15	10	1	7	4	DNA Recombination complex
	29	10	1	5	3	DNA Pol III core complex
	46	4	1	3	3	Carbohydrate transport/metabolism complex - contains enolase
	45	11	1	7	2
	34	5	1	4	2
	35	5	1	4	2
	11	2	1	2	2
	27	9	1	3	1
	59	2	1	2	1
	100	2	1	2	1
	70	2	1	2	1
	98	2	1	1	1
	24	5	1	2	0
	31	4	1	2	0
	14	3	1	2	0
	68	2	1	2	0
	74	2	1	2	0
	2	5	1	1	0
	42	4	1	1	0
	20	4	1	1	0
	21	4	1	1	0
	43	2	1	1	0
	109	2	1	1	0
	55	2	1	1	0
	56	2	1	1	0
	58	2	1	1	0
	76	2	1	1	0
